1                                   **The Typhoid Toxin Produced by the**  
2                                   **Nontyphoidal *Salmonella* Serovar Javiana Can Utilize Multiple**  
3                                   **Binding Subunits, which Compete for Inclusion in the Holotoxin**

4  
5 Running Title: Typhoid toxin's multiple binding subunits

6  
7  
8 Gaballa A<sup>1</sup>, Harrand AS<sup>1</sup>, Cohn AR<sup>2</sup>, Wiedmann M<sup>1</sup>, and Cheng RA<sup>1\*</sup>

9  
10 Affiliations:

11 <sup>1</sup>Department of Food Science, Cornell University, Ithaca, NY, USA 14853

12 <sup>2</sup>Department of Microbiology, Cornell University, Ithaca, NY, USA 14853

13 \*Corresponding author: Rachel A. Cheng: 324 Stocking Hall, Cornell University, Ithaca, NY  
14 14853; Phone Number (607) 255-1266; E-mail: [ram524@cornell.edu](mailto:ram524@cornell.edu)

15  
16  
17  
18 Number of Figures: 5

19 Number of words: 6,258

20

21  
22  
23  
24  
25  
26  
27  
28  
29  
30  
31  
32  
33  
34  
35  
36  
37  
38  
39  
40  
  
41  
42

## Abstract

*Salmonella enterica* encodes a wide array of virulence factors. One novel virulence factor, a DNA-damaging toxin known as the typhoid toxin (TT), was recently characterized in >40 nontyphoidal *Salmonella* (NTS) serovars. Interestingly, these NTS serovars, including *S. enterica* subsp. *enterica* serovar Javiana, also encode *artB*, a homolog of the binding subunit (PltB) of the TT. Here, we show that ArtB and PltB compete for inclusion in the pentameric binding subunit of the TT. Using a combination of *in silico* modeling, a bacterial two-hybrid system expressed in *S. Javiana*, and tandem affinity purification (TAP) of the holotoxin subunits, we show that ArtB and PltB interact *in vivo*. Furthermore, binding subunits composed of homo- and heteropentamers of ArtB and PltB are able to associate with CdtB and PltA to form biologically active toxins. As *artB* was, (i) conserved among *S. Javiana* isolates, and (ii) co-expressed with *pltB* and *cdtB* under Mg<sup>2+</sup>-limiting conditions, we hypothesized that ArtB and PltB compete for inclusion in the binding subunit. Using a novel competition assay, we show that PltB outcompetes ArtB for inclusion in the binding subunit, when cultured at neutral pH. Together, our results suggest that the TT produced by *S. Javiana* utilizes multiple configurations of the binding subunit, representing a novel toxin form and adaptation mechanism for the AB<sub>5</sub> toxin family. Our work suggests that *Salmonella* serovars, including *S. Javiana*, evolved to encode and maintain multiple binding subunits that can be used to form an active toxin, which may enhance the variety of cells, tissues, or hosts susceptible to this novel form of the TT.

Key Words: typhoid toxin, nontyphoidal *Salmonella*, ArtB, Javiana, AB<sub>5</sub> toxin

## Introduction

The TT produced by *S. Typhi*, and >40 NTS serovars (den Bakker et al., 2011; Miller and Wiedmann, 2016a), has been proposed as a key virulence factor, acting at both the single-cell and systemic levels (Haghjoo and Galán, 2004; Spanò et al., 2008; Song et al., 2013; Del Bel Belluz et al., 2016; Miller et al., 2018). The TT incorporates the nuclease activity of the CdtB subunit of the cytolethal distending toxin (CDT) (Haghjoo and Galán, 2004; Nešić et al., 2004) with the mono-ADP-ribosyltransferase activity of the pertussis toxin (called the PltA subunit), resulting in a toxin that induces a DNA damage response (DDR) and subsequent cell cycle arrest (Spanò et al., 2008; Song et al., 2013) in eukaryotic cells. The resulting damaged DNA is proposed to play a role in both disease manifestation (Song et al., 2013) and colonization and persistence of the toxin-producing bacteria in the host (Ge et al., 2005; Del Bel Belluz et al., 2016). The binding subunit of the TT was originally characterized as a pentameric ring of PltB monomers (Song et al., 2013).

A homolog of PltB, called ArtB, was originally identified in *S. Typhimurium* DT104 (Saitoh et al., 2005). As a proof of concept, Gao et al., showed that ArtB from *S. Typhimurium* DT104 can assemble into a homopentamer *in vitro*, and further confirmed that the ArtB homopentamer can interact with CdtB and PltA from *S. Typhi* and form a biologically active holotoxin both *in vitro* and *in vivo* (Gao et al., 2017). While both ArtB and PltB bind to glycan modifications on sialic acids on host cells, ArtB is able to bind both Neu5Ac- and Neu5Gc-terminated glycans on sialic acids, whereas PltB preferentially binds Neu5Ac-terminated glycans (Song et al., 2013; Gao et al., 2017). Gao et al. proposed that the expanded binding repertoire of ArtB could reflect the expanded host range of *S. Typhimurium* DT104, despite the fact that serovar *S. Typhimurium* isolates do not encode *cdtB*, *pltA*, or *pltB* (Gao et al., 2017).

We previously established that multiple NTS serovars naturally encode both *artB* and *pltB* (den Bakker et al., 2011; Rodriguez-Rivera et al., 2015; Miller et al., 2018), including *S. Javiana*, the 4<sup>th</sup> most commonly isolated *S. enterica* serovar associated with human clinical illness in the US (CDC, 2016). As deletion of both *artB* and *pltB* is necessary to abolish toxin activity (Miller et al., 2018), we hypothesized that *S. Javiana* isolates have the ability to produce holotoxins with binding subunits composed of homo- or heteropentamers of either ArtB or PltB, or a mixture of both. Here, we show that *S. Javiana* can use both ArtB and PltB as homo- and heteropentameric binding subunits to form a biologically-active toxin, and that both *artB* and *pltB* are co-expressed and compete for inclusion in the binding subunit of the holotoxin.

## Materials and Methods

### Bacterial strains, plasmids, primers, and media

Bacterial strains used in this study are listed in Table S1, vectors and recombinant constructs in Table S2, and primers in Table S3. Bacterial strains were routinely grown in Difco Lennox broth pH 7 (LB; Becton Dickinson [BD], Franklin Lakes, NJ). For two-hybrid system interactions, *E. coli* and *S. Javiana* strains were grown in M63 medium with maltose as the sole carbon source (Battesti and Bouveret, 2012). N-salts minimal medium (pH 5.8 or 7) containing 8  $\mu$ M MgSO<sub>4</sub> (Deiwick et al., 1999) was used for experiments assessing RNA transcript levels. Unless otherwise indicated, ampicillin and kanamycin were used at 100  $\mu$ g/mL and 50  $\mu$ g/mL, respectively, in complex medium (LB) and 50  $\mu$ g/mL and 25  $\mu$ g/mL, respectively, in chemically defined medium (M9 or N-salts minimal media).

Human intestinal epithelial cells (HIEC-6 cells; ATCC, Manassas, VA), (Perreault and Beaulieu, 1996), were routinely cultured in Opti-MEM (Gibco-Invitrogen, Carlsbad, CA) medium supplemented with 10% (v/v) fetal bovine serum (FBS; Gibco-Invitrogen) and

92 recombinant epidermal growth factor (10 ng/ml; Gibco-Invitrogen) at 37°C with 5% CO<sub>2</sub>.  
93 Cell supernatants were tested routinely for *Mycoplasma* spp. and *Acheoplasma* spp. infection  
94 using the VenorGEM *Mycoplasma* detection kit (Sigma-Aldrich, St. Louis, MO).

#### 95 **Cloning and expression of toxin proteins in *E. coli***

96 To express CdtB, PltA, PltB, and ArtB, we cloned and expressed the following  
97 constructs in *E. coli* BTH101 cells (Karimova et al., 2001): (i) *pltB-3xFLAG-artB-c-Myc*  
98 cloned into the high copy number pUT18 vector, or (ii) *cdtB-His-pltA-FLAG* and *cdtB-His-*  
99 *pltA-Strep*, each cloned into the low copy number pKNT25 plasmid. All PCRs were  
100 performed using the high-fidelity polymerase Q5 (New England Biolabs [NEB], Ipswich,  
101 MA) and the primers listed in Table S3. All constructs were designed to contain identical  
102 ribosome binding sites (AGGAGG) 5-7 bases upstream of the ATG start codons. The DNA  
103 sequences of all constructs were confirmed with Sanger sequencing.

104 Construction of pUT18::*pltB-3xFLAG-artB-c-Myc* was done as follows: PCR  
105 products *pltB-3xFLAG* and *artB-c-Myc*, were digested using XbaI-KpnI and KpnI-EcoRI,  
106 respectively and ligated into XbaI-EcoRI-digested pUT18 using T4 DNA Ligase (NEB) to  
107 form pUT18::*pltB-3xFLAG-artB-c-Myc*. For construction of pKNT25::*cdtB-His-pltA-FLAG*  
108 and pKNT25::*cdtB-His-pltA-Strep* PCR products *cdtB-His* and *pltA-FLAG* or *pltA-Strep* were  
109 digested with XbaI-KpnI and KpnI-SacI respectively, followed by ligation into XbaI-SacI-  
110 digested pKNT25. In order to construct pKNT25 containing *cdtB-His* only, the *pltA-FLAG*  
111 region was deleted from pKNT25::*cdtB-His-pltA-FLAG* by digesting plasmid DNA with  
112 KpnI and SacI. The resulting 3' overhang was removed, and the 5' overhang was filled in  
113 with T4 DNA polymerase (NEB). Following purification, the plasmid was self-ligated with  
114 T4 DNA ligase. pKNT25::*pltA-FLAG*, pUT18::*pltB-3xFLAG* and pUT18::*artB-c-Myc* were  
115 constructed similarly.

116 Expression of these constructs was carried out in an *E. coli* BTH101 cAMP-null strain  
117 (*cyaA*<sup>-</sup>) due to the observed toxicity of TT components in *E. coli* NEB5a cells (NEB).  
118 Sequence-confirmed clones were co-transformed (pUT18 and pKNT25) into *E. coli* BTH101  
119 cells, and were selected for ampicillin and kanamycin resistance on LB agar + 1% glucose,  
120 incubated at 37°C.

#### 121 **Assessment of two-hybrid system interactions**

122 Interactions of CdtB, PltA, PltB, and ArtB subunits were first assessed using the  
123 Bacterial Adenylate Cyclase Two-Hybrid (BACTH) system in *E. coli* BTH101 cells  
124 (Karimova et al., 2001). The full-length polypeptides of the toxin subunits (including signal  
125 peptides) were fused to the N-terminal of T25 or T18 subunits in pKNT25 and pUT18,  
126 respectively (Fig. 3B). To ensure cytoplasmic CyaA activity, we also cloned the coding  
127 regions of CdtB, PltA, PltB, and ArtB lacking the signal peptide, into BACTH plasmids for  
128 fusion at either the N-terminal (pKNT25, pUT18) or C-terminal (pKT25, pUT18C). Regions  
129 encoding the C-terminal interacting domains of PltA, PltB, and ArtB, as predicted from the  
130 TT structure (Song et al., 2013; Gao et al., 2017), were also cloned into pKNT25, pUT18,  
131 pKT25, and pUT18C plasmids (Table S2 and S3). As 324 theoretical combinations exist (see  
132 Table S4), we developed a high-throughput screening method. Screening was performed by  
133 co-transforming T18 and T25 vectors (see Table S5 for details) into *E. coli* BTH101 cells,  
134 followed by selection on LB agar + 1% glucose with ampicillin and kanamycin, and  
135 subsequently sub-streaking onto LB agar with ampicillin and kanamycin plates containing 1  
136 mM IPTG and 40 µg/mL of X-gal for blue white screening. To ensure that positive  
137 interactions were not false positive clones arising from cAMP-independent CAP\*  
138 spontaneous mutations, plasmid DNA was purified from blue colonies, which was re-  
139 transformed into *E. coli* BTH101 competent cells. Plasmids were isolated from clones that  
140 were blue after the second transformation, and were analyzed by Sanger sequencing to  
141 determine the identity of the interacting domains.

## 142 **Construction of *cyaA*<sup>-</sup> *S. Javiana***

143 Deletion of *cyaA* was performed to enable screening for maltose utilization resulting  
144 from an interaction of T18- and T25-fused proteins. Whole genome sequence analysis  
145 identified a single full-length *cyaA* in the *S. Javiana* strain used in this study (FSL S5-0395).  
146 Construction of a *cyaA*<sup>-</sup> *S. Javiana* strain was performed using the  $\lambda$ -Red recombinase system  
147 as described previously (Miller et al., 2018). Plasmids and primers used to generate the *cyaA*<sup>-</sup>  
148 strain are listed in Tables S2 and S3, respectively. The in-frame deletion was confirmed by  
149 Sanger sequencing. The mutant strain was also phenotypically confirmed by a lack of growth  
150 in M63 medium containing maltose as the sole carbon source; growth was restored upon  
151 addition of 0.05 mM cAMP.

## 152 **Expression of the two-hybrid system constructs in M63 minimal medium**

153 Plasmids containing ArtB and PltB constructs were transformed into the *S. Javiana*  
154 *cyaA*<sup>-</sup> strain via electroporation. Transformed cells were selected on LB agar plates  
155 supplemented with ampicillin and kanamycin. Overnight cultures (12 – 14 h) were grown  
156 shaking at 30°C in LB broth with ampicillin and kanamycin. Subsequently, M63 broth  
157 containing ampicillin and kanamycin, and 0.02 mM cAMP was inoculated with an overnight  
158 culture (diluted 1:100), followed by incubation with shaking at 30°C for 24 h. The addition of  
159 0.02 mM cAMP (a concentration that does not support the growth of negative controls; Fig.  
160 3C) was essential for the basal expression of the fusion proteins. Growth was assessed as  
161 optical density at 600 nm (OD<sub>600</sub>), which was measured after 24 h with a BioTek synergy  
162 plate reader (BioTek Instruments, Inc., Winooski, VT). Two-hybrid system interactions were  
163 also performed by growing *E. coli* BTH 101 cells harboring two-hybrid system plasmids in  
164 M63 broth containing ampicillin and kanamycin without exogenous cAMP. Growth was  
165 assessed using the same conditions as described for *S. Javiana*. Each growth assay was  
166 performed as three independent experiments for both *E. coli* and *S. Javiana* strains.

## 167 **Molecular modeling of different forms of the TT binding subunit**

168 *In silico* modeling of TT subunits was done using the Phyre2 server (Kelley et al.,  
169 2015). Construction of the TT with different ratios of PltB and ArtB was performed using the  
170 MatchMaker tool in Chimera software (Pettersen et al., 2004). The stability and biological  
171 relevance of homo- and heteropentamer formation was calculated as free energies from  
172 individual subunit-subunit interactions within the pentamer, using the PDBe Protein  
173 Interfaces, Surfaces and Assemblies (PDBe PISA) server (Krissinel and Henrick, 2007).

## 174 **Tandem Affinity Purification (TAP)**

175 Beveled flasks containing 250 mL of LB with ampicillin and kanamycin were  
176 inoculated with overnight cultures (12 – 14 h; 1:500 dilution) of *E. coli* BTH101 harboring  
177 plasmids pAG37 and pAG43, which express PltB-3xFlag ArtB-c-Myc, and CdtB-His PltA-  
178 Strep, respectively. Cells were grown shaking at 200 rpm for 4.5 h at 37°C, followed by  
179 induction with IPTG and cAMP (both 1 mM final concentration) for an additional 1.5 h.  
180 Cells were collected by centrifugation and stored at -80°C. Cells were thawed on ice, re-  
181 suspended in 2 ml of NTA buffer (50 mM NaH<sub>2</sub>PO<sub>4</sub>, pH 8.0, 0.3M NaCl) containing 2 mg  
182 lysozyme, and were incubated at 37°C for 30 min. Cell lysis was achieved with three rounds  
183 of freeze-thaw cycles (submersion in liquid nitrogen and incubation at 37°C) followed by  
184 sonication using a Branson Sonifier 250 sonicator (80% duty cycle, 7 output control) for 30  
185 sec on ice (performed twice). Cell debris was removed by centrifugation at 15,000 x g for 10  
186 min. For CdtB-His purification, 50  $\mu$ l of Dynabeads (Thermo Fisher Scientific; Waltham,  
187 MA) were washed twice with 500  $\mu$ l of cold NTA buffer in preparation for TAP. Cell lysates  
188 were added to beads, followed by incubation overnight (12 - 14 h) at 4°C in a tube rotator.  
189 Beads were collected on a magnetic stand and were washed three times at 4°C with 500  $\mu$ l of  
190 cold NTA buffer with incubation periods of 10 min. Proteins were eluted using 300  $\mu$ l of  
191 NTA buffer containing 250 mM imidazole. Eluted proteins were then dialyzed against TBS

192 buffer (50 mM Tris-Cl, 150 mM NaCl, pH 7.5) containing 10% glycerol, and were divided  
193 into two fractions. PltB-3xFLAG was pulled down using anti-FLAG magnetic beads (Sigma-  
194 Aldrich) according to the manufacturer's instructions. Proteins were eluted from beads by  
195 boiling in the presence of 100  $\mu$ l of 1X SDS-loading dye. PltB-3xFLAG and ArtB-c-Myc  
196 were detected in sub-fractions using western blot analyses performed with rabbit anti-FLAG  
197 (Sigma-Aldrich) and rabbit anti-c-Myc (Sigma-Aldrich) antibodies.

#### 198 **Western blot detection of proteins**

199 Protein samples were resolved on 4-20% Mini-PROTEAN TGX Precast Protein SDS-  
200 PAGE gels (BioRad Laboratories; Hercules, CA) and blotted on PVDF membranes using the  
201 Trans-Blot Turbo transfer system (BioRad). Membranes were incubated in TBS containing  
202 0.1% tween 20 (TTBS) and 5% blocking reagent (BioRad) with gentle shaking at room  
203 temperature for 30 min. Primary antibodies were added using the manufacturer's  
204 recommended dilution in TTBS with 0.5% blocking reagent, followed by incubation with  
205 gentle shaking at room temperature for 12 – 14 h. Membranes were washed three times with  
206 TTBS, followed by incubation (2 h at room temperature with gentle shaking) with secondary  
207 antibodies added at manufacturer's recommended dilutions in TTBS with 0.5% blocking  
208 reagent. Membranes were washed twice in TTBS and once in TBS, before detection. Horse  
209 radish peroxidase-conjugated secondary antibodies were detected using Clarity Western ECL  
210 substrate (BioRad). Blots were visualized using the BioRad ChemiDoc MP imaging system.

#### 211 **Binding subunit exchange assay**

212 Protein expression and cell lysis of *E. coli* BTH101 strains (FSL G4-0035 to G4-  
213 0038) were performed as described above for TAP with cell pellets resuspended in PBS  
214 containing 10% glycerol. Final total protein concentration was determined  
215 spectrophotometrically (Nanodrop 2000c) (Layne, 1957;Stoscheck, 1990). Total protein of  
216 the PltB-3xFLAG-containing lysate was added in varying concentrations to 100  $\mu$ g of total  
217 lysate containing CdtB-His, PltA-FLAG, and ArtB-c-Myc for a final reaction volume of 50  
218  $\mu$ l of PBS with 10% glycerol. The reaction was incubated at 37°C for 30 min, followed by 2 h  
219 incubation at 4°C to ensure equilibrium. A 200  $\mu$ l aliquot of NTA buffer was added and  
220 protein complexes were purified using Ni-NTA beads, as described above. The assay was  
221 also performed with lysates containing CdtB-His, PltA-FLAG, and PltB-3xFLAG as target  
222 and ArtB-c-Myc as the competitor. All proteins were detected with western blotting using  
223 antibodies that recognize the corresponding protein tag (i.e., anti-FLAG, anti-His, and anti-c-  
224 Myc); three independent experiments were performed.

#### 225 **Intoxication of HIEC-6 cells with crude lysates of toxin components expressed in *E. coli*** 226 **BTH101 cells**

227 Fresh OptiMem (containing 10 ng/ml r-EGF and 10% FBS) medium supplemented  
228 with 10  $\mu$ g/ml gentamicin was added to HIEC-6 cells grown to confluency on 12 mm  
229 coverslips (Thermo Fisher Scientific) in 24-well plates (Corning Inc.; Corning, NY). Lysates  
230 containing various combinations of toxin subunits were then added to HIEC-6 cells at a final  
231 concentration of 400  $\mu$ g total protein per ml, and the HIEC-6 cells were subsequently  
232 incubated at 37°C with 4.5% CO<sub>2</sub>. Immunofluorescence (IF) detection of DDR foci and cell  
233 cycle analyses were performed at 24  $\pm$  2 h after inoculation. Three independent experiments  
234 were performed for both cell cycle and IF detection experiments.

#### 235 **IF detection of DDR proteins $\gamma$ H2AX and 53BP1**

236 IF staining for  $\gamma$ H2AX and 53BP1 foci was performed as described previously (Miller  
237 and Wiedmann, 2016b;Miller et al., 2018). The following antibodies were used: mouse anti-  
238  $\gamma$ H2AX (EMD Millipore, Billerica, MA), rabbit anti-53BP1 (Novus Biologicals, Littleton,  
239 CO), donkey anti-rabbit conjugated to Alexa 555 (diluted 1:500), and donkey anti-mouse  
240 conjugated to Alexa 647 (1:200; all Thermo Fisher Scientific). Nuclei were stained with 4',  
241 6-diamidino-2-phenylindole (DAPI; Thermo Fisher Scientific) for 5 min at room

242 temperature. Microscopic observation was performed using a Zeiss 710 confocal microscope.  
243 FIJI software was used for image processing (Schindelin et al., 2012). Cells (at least 50 were  
244 scored per treatment) were considered positive if their nuclei had at least four 53BP1 foci,  
245 and also contained  $\gamma$ H2AX foci.

#### 246 **Cell cycle arrest**

247 Staining with propidium iodide for cell cycle analysis determination was performed as  
248 described previously (Miller and Wiedmann, 2016b; Miller et al., 2018). DNA content (for  
249 cell cycle analysis) was assessed using the FACSARIA flow cytometer (BD). Gating was  
250 performed to exclude multiplets as described previously (Wersto et al., 2001; Miller et al.,  
251 2018).

#### 252 **Phylogenetic analyses**

253 Sequences from a convenience sample of 40 *S. Javiana* isolates, representing 28  
254 unique SNP clusters were downloaded from the NCBI Pathogen Detection browser  
255 (<https://www.ncbi.nlm.nih.gov/pathogens/isolates/#/search/>; see Table S7 for details). *S.*  
256 Mississippi isolate SRR1960042 was included as an outgroup for phylogenetic analyses (see  
257 Table S7). Illumina adapters from sequence reads were trimmed, and low-quality bases were  
258 removed using Trimmomatic 0.33 with default settings (Bolger BM, 2014). Determination of  
259 the quality of trimmed reads was done using FastQC v0.11.7 (Andrews, 2010). *De novo*  
260 assembly of genomes was done using SPAdes 3.6.0 (Bankevich A, 2012). To assess the  
261 qualities of draft genomes, QUAST 3.2 (Gurevich A, 2013) was used, followed by BBmap  
262 35.49 (Busnell, 2015) and SAMtools 1.3.1 (Li H, 2009) to calculate the average coverage.  
263 Serotypes of draft genomes were confirmed using SISTR (Yoshida CE, 2016). kSNP3 was  
264 used to identify core SNPs in all 40 *S. Javiana* genomes and strain FSL S5-0395; a *k*-mer size  
265 of 19 was used, as determined using kSNP3's Kchooser function (Gardner SN, 2015). A  
266 phylogenetic tree was constructed with RaXML (Stamatakis, 2014) using a general time-  
267 reversible model with gamma-distributed sites constructed from 1,000 bootstrap repetitions.  
268 FigTree v. 1.4.4 was used for editing RaXML output (Young et al., 2000).

#### 269 **BLAST detection of TT genes and artAB in S. Javiana and amino acid alignment**

270 The presence of *artA*, *artB*, *pltA*, *cdtB*, and *pltB* in all 40 *S. Javiana* isolates was  
271 determined using nucleotide BLAST (blastn) version 2.3.0 with a maximum e-value of 1e-20,  
272 a gap opening penalty of 3, and a gap extending penalty of 1, to query *artA*, *artB*, *pltA*, *cdtB*,  
273 and *pltB* sequences from *S. Javiana* strain CFSAN001992 (Allard et al., 2013) against the  
274 isolates' assembled draft genomes (Camacho C, 2009). Geneious software (Auckland, New  
275 Zealand) was used to perform nucleotide and amino acid sequence alignments of the genes  
276 extracted from the 40 *S. Javiana* isolates.

#### 277 **qPCR quantification of artB and pltB differential expression**

278 Overnight cultures (16 – 18 h) of FSL S5-0395 grown in LB broth were sub-cultured  
279 1:1000 into LB or N-salts minimal medium (either pH 7 or pH 5.8), and sub-cultured samples  
280 were grown at 37°C shaking at 200 rpm until cells reached mid-exponential phase (3 h for  
281 LB, 5 h for N-salts minimal medium). RNA was stabilized with RNA protect (Qiagen), and  
282 was collected using the RNEasy kit (Qiagen). DNA was depleted with Ambion Dnase I (Life  
283 Technologies), which was confirmed with qPCR; a cycle threshold of >34 for *rpoB* in Dnase-  
284 treated RNA samples was used as a threshold for successful DNA depletion. cDNA libraries  
285 were prepared with the Superscript Reverse Transcription kit (ThermoFisher), according to  
286 manufacturer's instructions. qPCR was performed with SYBR Green 2X Master Mix  
287 (Applied Biosystems) in a reaction containing 0.4  $\mu$ M of each primer (see Table S4) and 1  $\mu$ L  
288 of cDNA (~approximately 15 ng of cDNA) as template. Fold expression was calculated by  
289 raising the  $\Delta\Delta$ Ct to the power of the efficiency calculated for each primer pair (Schmittgen  
290 and Livak, 2008). Results are the average of three independent experiments, each performed  
291 in technical duplicate.

## 292 **Statistical analyses and data availability**

293 Statistical differences were assessed using R studio version 3.4.2. using packages  
294 lme4 (Bates et al.) 1.1-14, emmeans version 1.3.3 (2016), lmerTest version 2.0-33  
295 (Kuznetsova et al., 2015), and multicomp version 1.4-8 (Hothorn et al., 2008) for Dunnett's  
296 test for multiple comparisons adjustment. Scripts and data sets are available online at  
297 [https://github.com/ram524/2019\\_ArtB](https://github.com/ram524/2019_ArtB).

298

299

## **Results**

### 300 **artB is highly conserved among *S. Javiana* isolates.**

301 As ArtB had previously been suggested to form a holotoxin with CdtB and PltA (Gao  
302 et al., 2017), we first determined the presence and conservation of ArtB and TT genes in *S.*  
303 *Javiana* (Fig. 1A), using BLAST searches for a sample of 40 isolates (Timme et al., 2019).  
304 All 40 *S. Javiana* isolates encoded full-length *pltA*, *pltB*, and *cdtB*. *artB* was detected in 38 of  
305 40 (95%) *S. Javiana* isolates, with five of these 38 isolates (13.2%) containing a 46-  
306 nucleotide deletion in *artB* (shown in blue in Fig. 1B), resulting in a premature stop codon  
307 (Fig. 1C). Among the 33 isolates encoding a full-length *artB*, all had a 100% nucleotide  
308 identity over the full-length sequence of this gene (426 nt). In *S. Javiana*, ArtB, is encoded in  
309 an operon with *artA*, which includes a frame-shift mutation resulting in a premature stop  
310 codon (Fig.1A). The *artA* pseudogene was also detected among the 38 isolates that were  
311 confirmed to encode *artB*. As *artAB* was previously shown to be encoded on a prophage in *S.*  
312 *Typhimurium* DT104 (Saitoh et al., 2005), we also used (i) PHASTER (Arndt et al., 2016),  
313 and (ii) manual screening to check for prophage genes at or flanking the *artAB* locus for the  
314 closed *S. Javiana* genome CFSAN001992. Neither method detected prophage-encoded genes  
315 at the *artAB* locus, suggesting that *artAB* in *S. Javiana* is not encoded on a prophage.

### 316 **In silico modeling suggests heteropentamers of ArtB and PltB are energetically feasible.**

317 While the structure of the TT binding subunit with homopentamers of PltB (Song et  
318 al., 2013), and ArtB (Gao et al., 2017), have been resolved experimentally, the ability of the  
319 toxin to form heteropentamers was unknown. We first modeled the *S. Javiana* ArtB structure  
320 based on the *S. Typhimurium* DT104 ArtB structure and constructed models of the TT with  
321 different ratios of ArtB and PltB in the binding subunit. Interface areas and the  $\Delta G$  solvation  
322 energy gain of the ArtB complex formation for *S. Typhimurium* DT104 ArtB and *S. Javiana*  
323 strain CFSAN001992 ArtB were highly similar, supporting the modeling strategy used. ArtB  
324 was shown to interact with more specificity and stronger hydrophobicity with itself (ArtB-  
325 ArtB  $\Delta G$  average: -11.5) than with PltB (ArtB-PltB  $\Delta G$  average: -10.5) (Fig. 2); however, the  
326 theoretical interaction of ArtB-PltB was predicted to be stronger than PltB-PltB ( $\Delta G$  average:  
327 -7.5; Fig. 2).

### 328 **Two-hybrid system interactions suggest that ArtB and PltB interact in the native host *S. Javiana*, but not in *E. coli* BTH101.**

330 Next, we assessed the ArtB-PltB interaction using an adenylate-cyclase two-hybrid  
331 system in *E. coli* BTH101 in combination with a novel high-throughput screening method  
332 (Fig. 3A). We designed constructs to assess possible interaction domains for each toxin  
333 component (CdtB, PltA, PltB, and ArtB) including, (i) the full-length protein, (ii) polypeptide  
334 sequences without the signal sequence, and (iii) the oligomerization domain as predicted  
335 from the TT structure (Song et al., 2013). Using this technique, we confirmed PltB-PltB,  
336 ArtB-ArtB, and CdtB-PltA interactions (Fig. 3B), but a PltB-ArtB interaction was not  
337 detected (Fig. 3B and S1). As increasing levels of cAMP resulting from a positive interaction  
338 also activates the maltose catabolic pathway of the BACTH system, maltose utilization can  
339 also be used as a screening method as the use of maltose as the sole carbon source requires  
340 cAMP activation of the catabolite activator protein (Battesti and Bouveret, 2012). Therefore,  
341 we further confirmed the results of the two-hybrid system by growing a subset of the *E. coli*



342 BTH101 cells in M63 minimal medium (without exogenous cAMP as this enabled growth of  
343 the negative control strain) and found that only one PltB-PltB clone showed significant  
344 growth, indicating an interaction; no ArtB-ArtB or PltB-ArtB interactions were detected.

345 To determine if an accessory protein, which may be absent in *E. coli* BTH101, was  
346 necessary for the interaction of ArtB and PltB, we constructed a *cyaA*<sup>-</sup> *S. Javiana* mutant for  
347 testing interactions in *Salmonella* by transforming a sub-set of the PltB- and ArtB-containing  
348 constructs into *S. Javiana cyaA*<sup>-</sup> strains, and then growing them in M63 minimal medium with  
349 maltose as the sole carbon source; growth in M63 minimal medium was used as an  
350 alternative screening method as *S. Javiana* is  $\beta$ -galactosidase null. In *S. Javiana*, there were  
351 significant ( $P < 0.05$ , uncorrected p-value) PltB-PltB, ArtB-ArtB, and ArtB-PltB interactions  
352 (see Fig. 3C and Table S6). Upon correcting for multiple comparisons, one of the ArtB-PltB  
353 interactions was significant at  $\alpha = 0.1$  ( $P = 0.0975$ ; see Fig. 3C). Together, the results of the  
354 two-hybrid system suggest that ArtB-PltB interactions may occur in *S. Javiana* cells.

### 355 **PltB and ArtB proteins are co-purified and can form biologically active binding** 356 **subunits of the TT.**

357 As previous studies have suggested that the TT binding subunit exists as a stable  
358 pentamer (Song et al., 2013), we reasoned that despite the weak ArtB-PltB interaction  
359 demonstrated by the two-hybrid system in *S. Javiana*, interactions in the assembled holotoxin  
360 might be more stable. Therefore, we used tandem affinity purification (TAP) to (i) determine  
361 if PltB and ArtB can interact with PltA and CdtB to form a complete holotoxin, and (ii)  
362 assess if holotoxins are formed with homo- or heteropentamers of PltB and ArtB. Purification  
363 of His-tagged CdtB followed by purification with 3xFLAG-tagged PltB (Fig. 3D) revealed  
364 that ArtB is co-purified with PltB in both pull-down steps, supporting that PltB and ArtB can  
365 form heteropentameric binding subunits.

366 To confirm the activity of both homo- and heteropentameric forms of the binding subunit,  
367 we co-incubated toxin subunits from the same lysates used for TAP with human intestinal  
368 epithelial cells (HIEC-6 cells). Co-incubation with the lysates containing all four toxin  
369 subunits (i.e. CdtB, PltA, PltB, and ArtB) resulted in approx. 83% of cells with an activated  
370 DDR (Fig. 4A and 4B). Similarly, HIEC-6 cells co-incubated with lysates containing CdtB  
371 and PltA with either PltB or ArtB, both resulted in DDR activation in approx. 78% of HIEC-6  
372 cells. There was no difference (for all comparisons,  $P = 1$ ) between lysates containing both  
373 PltB and ArtB subunits (which showed that ArtB was co-purified with PltB in TAP  
374 experiments; Fig. 3D), and those having only ArtB or only PltB homopentamers (Fig. 4A and  
375 4B). Furthermore, cell cycle analyses of HIEC-6 cells co-incubated with lysates containing  
376 holotoxins with homopentamers of PltB or ArtB, or a mix of both PltB and ArtB binding  
377 subunits had a significantly higher (Mix:  $P = 0.005$ , PltB only:  $P = 0.037$ , and ArtB only:  $P =$   
378  $0.006$ , respectively) proportion of cells accumulated in the G2/M phase, relative to control  
379 cells (Fig. 4C), a phenotype that is commonly associated with exposure to the TT (Haghjoo  
380 and Galán, 2004; Spanò et al., 2008).

### 381 **Both artB and pltB are co-expressed with cdtB at high levels in low Mg<sup>2+</sup> medium.**

382 As *pltB* expression in *S. Typhi* (Fowler and Galan, 2018) was previously shown to  
383 occur when cells were cultured under Mg<sup>2+</sup>-limiting conditions, we compared the levels of  
384 RNA transcripts of *S. Javiana* cultured in LB broth (pH 7) and N-salts minimal medium  
385 containing 8  $\mu$ M Mg<sup>2+</sup> (pH 7). When *S. Javiana* was cultured in N-salts minimal medium (pH  
386 7), RNA transcript levels of *pltB*, *cdtB*, and *artB* were on average 135-, 364-, and 44-fold  
387 higher, respectively, compared to levels in *S. Javiana* cells grown in LB broth. As production  
388 of the TT is hypothesized to occur when *Salmonella* is located within the *Salmonella*-  
389 containing vacuole (SCV) (Chang et al., 2016), we also grew *S. Javiana* in N-salts minimal  
390 medium acidified to pH 5.8, which has been shown previously to stimulate expression of SPI-  
391 2 genes (Deiwick et al., 1999). Under acidic conditions, expression of *cdtB* and *artB*

392 increased marginally, to 382-fold and 86-fold (see Fig. 5B), while *pltB* transcript levels were  
393 lower when *S. Javiana* was cultured in N-salts minimal medium at pH 5.8 (approximately 2-  
394 fold lower compared to expression in N-salts minimal medium at pH 7). Finally, the ratio of  
395  $\Delta Ct_{pltB} : \Delta Ct_{artB}$  (representing the inverse relationship of the relative ratio of *pltB* transcripts to  
396 *artB* transcripts) was significantly lower for *S. Javiana* grown in N-minimal salts medium at  
397 pH 7 compared to pH 5.8 ( $p = 0.0047$ ), suggesting that there are relatively higher levels of  
398 *pltB* transcripts at pH 7, than at pH 5.8. Together, these results suggest that *artB* and *pltB* are  
399 co-expressed with *cdtB* under low  $Mg^{2+}$ - conditions, but *pltB* is expressed at relatively higher  
400 levels at neutral pH (pH 7), while *artB* is expressed at higher levels at pH 5.8.

#### 401 **PltB competes more efficiently for inclusion in the holotoxin than ArtB.**

402 Given that (i) *artB* and *pltB* are co-expressed, and (ii) ArtB and PltB are co-purified,  
403 we hypothesized that ArtB and PltB likely compete for inclusion in the holotoxin. Upon  
404 challenging the CdtB-PltA-ArtB complex with excess amounts of PltB followed by  
405 purification of the holotoxin, PltB efficiently replaced ArtB, thereby reducing the total  
406 amount of ArtB bound in the holotoxin (Fig. 5A). This result was not reciprocal, however, as  
407 ArtB was far less efficient at replacing PltB in a CdtB-PltA-PltB holotoxin (Fig. 5A).  
408 Together, this suggests that while ArtB can form a biologically-active binding subunit, PltB  
409 ultimately outcompetes for inclusion in the binding subunit.

410

411

### 411 **Discussion**

412 Here, we show that the nontyphoidal serovar *S. Javiana* uses both ArtB and PltB to  
413 form homo- and heteropentameric binding subunits of the TT holotoxin. Interactions of ArtB  
414 and PltB are detected in *S. Javiana* cells, and ArtB and PltB are co-purified with CdtB and  
415 PltA (the active subunits of the toxin), indicating the formation of a heteropentameric  
416 holotoxin. Furthermore, *artB* and *pltB* are co-expressed along with *cdtB* under conditions  
417 which mimic the SCV (Deiwick et al., 1999). As a number of *Salmonella* serovars encode  
418 both *artB* and *pltB* (den Bakker et al., 2011;Rodriguez-Rivera et al., 2015), utilization of  
419 homo- and heteropentameric binding subunits suggests an evolutionary advantage for  
420 *Salmonella* serovars that encode both *artB* and *pltB*, as ArtB and PltB subunits have been  
421 shown to preferentially bind to different cells and tissues (Song et al., 2013;Gao et al., 2017).

#### 422 ***artB* is generally conserved among *S. Javiana* isolates.**

423 Here we show that the majority of *S. Javiana* isolates also encode the *artAB* operon  
424 (95% of the isolates examined here). Interestingly, at least 25 other serovars have also been  
425 shown to encode *artAB* (Rodriguez-Rivera et al., 2015;Tamamura et al., 2017). In this study,  
426 some of the *S. Javiana* isolates harbored *artB* with a 46 bp internal deletion, which could  
427 reflect either acquisition of a mutated *artB* or slipped-strand mispairing that occurred during  
428 DNA replication, which has been reported previously for promoting phenotypic diversity in  
429 bacterial pathogens such as *B. pertussis* (Decker et al., 2012). Regardless, a high proportion  
430 of *S. Javiana* isolates encode a full-length *artB*, implicating that *artB* plays a role in the  
431 serovar's virulence.

#### 432 **ArtB and PltB are co-expressed, but PltB outcompetes for inclusion in the binding 433 subunit.**

434 We previously showed that active TT was not produced by *S. Javiana* grown in LB  
435 broth (Miller and Wiedmann, 2016b). Here, we confirmed that expression of *pltB* is relatively  
436 low in LB broth, but expression is significantly induced (>100-fold) when *S. Javiana* cells are  
437 grown under  $Mg^{2+}$ -limiting conditions, which have been shown to induce SPI-2 gene  
438 expression in *S. Typhimurium* (Deiwick et al., 1999;Fass and Groisman, 2009), and  
439 expression of *pltB* in *S. Typhi* (Fowler and Galan, 2018). Importantly, we also established  
440 that *artB* is co-expressed with *cdtB* and *pltB* in *S. Javiana* cells cultured under  $Mg^{2+}$ -limiting  
441 conditions, despite *artB* being located nearly 500 kb upstream of the *cdtB*-islet (Fig. 1A).

442 Given that (i) *artB* and *pltB* are co-expressed, (ii) ArtB and PltB are structurally similar (Gao  
443 et al., 2017), and (iii) *in silico* analyses also suggested a favorable interaction between ArtB  
444 and PltB (Fig. 2), we hypothesized that ArtB and PltB might compete for inclusion in the  
445 binding subunit. While there was no evidence of an interaction between ArtB and PltB when  
446 the two-hybrid system was expressed in *E. coli* BTH101 cells, there was weak evidence to  
447 support an interaction in the native host *S. Javiana* (Fig. 3C). We were also able to detect  
448 ArtB in purified holotoxins using TAP to pull down CdtB, and then PltB, suggesting that  
449 ArtB and PltB interact. Furthermore, the ability of PltB to efficiently replace ArtB in a CdtB-  
450 PltA-ArtB holotoxin in a competition assay suggests that PltB has evolved as the preferred  
451 subunit of the TT, but some holotoxins likely contain a mixture of PltB and ArtB. Combined  
452 with evidence that suggests upregulation of *pltB* and *artB* under low Mg<sup>2+</sup> conditions (even  
453 though the PltB-ArtB ratios seem to be modulated by pH), this evidence suggests that ArtB  
454 and PltB are co-expressed and hence may be incorporated into the holotoxin as either homo-  
455 or heteropentamers of ArtB and PltB subunits.

456 Although our data, in *S. Javiana* and *in vitro*, support a model in which ArtB and PltB  
457 compete for incorporation and formation of heteropentamers in the holotoxin, the inability to  
458 detect an ArtB-PltB interaction in *E. coli* BTH101 cells suggests that additional factors may  
459 contribute to the assembly of the binding subunit. Given that TT genes and *artB* are  
460 expressed when *Salmonella* cells are grown in low Mg<sup>2+</sup> media, the requirement of a  
461 *Salmonella*-specific accessory protein such as a chaperone that is not expressed under the  
462 conditions used for the two-hybrid system in *E. coli*, or some other post-translational  
463 modification could explain why an interaction was observed in *S. Javiana* cells grown in M63  
464 broth, but not in *E. coli* BTH101 cells.

465 While most AB<sub>5</sub> toxin binding subunits exist as homopentamers of five identical  
466 monomers (i.e. shiga toxin, cholera toxin, subtilase toxin (Beddoe et al., 2010)), the pertussis  
467 toxin's binding subunit, which is homologous to both the PltB subunit of the TT and ArtB,  
468 uses four distinct monomeric subunits (i.e., S2, S3, S4, and S5) to form the five-component  
469 heteropentameric binding subunit (Locht et al., 2011). *In vitro*, the pertussis toxin's S2  
470 subunit can be replaced by the S3 subunit (Raze et al., 2006). Our data suggest that ArtB and  
471 PltB likely compete for inclusion in the binding subunit in a manner similar to that of the  
472 pertussis toxin. Alternatively, or in addition, differential regulation might enable transcription  
473 of *artB* under select environmental conditions (e.g., under reduced pH and/or other conditions  
474 not tested here). Finally, while the theoretical modeling, which predicted stronger ArtB-ArtB  
475 hydrophobic interactions, suggested ArtB homopentamers would indeed be more  
476 energetically favorable, these models were done in absence of the PltA-CdtB subunits. It is  
477 possible that the interaction between PltA and the pentameric binding subunit is what  
478 ultimately determines the stability of the holotoxin, as PltA inserts into the barrel of the  
479 binding pentamer in the holotoxin (Song et al., 2013). For example, PltB homopentameric  
480 binding subunits might have a stronger interaction with PltA than with homo- or  
481 heteropentamers containing ArtB.

#### 482 **Why express two binding subunits?**

483 Why would NTS serovars encode multiple binding subunits? One possibility is that  
484 the ability to produce toxins with PltB or ArtB homopentamers or PltB-ArtB heteropentamers  
485 would expand the variety of cells, tissues, or even hosts that are susceptible to this toxin.  
486 While PltB has been reported to preferentially bind Neu5Ac-terminated glycans, which are  
487 abundantly present in human cells due to a mutation in the converting enzyme CMAH that is  
488 required to produce Neu5Gc-terminated glycans (Deng et al., 2014), ArtB preferentially  
489 binds Neu5Gc-terminated glycans (Gao et al., 2017). Neu5Ac (targeted by PltB)  
490 predominates in chicken, turkey, and fish (Samraj et al., 2015), while Neu5Gc-terminated  
491 glycan levels (targeted by ArtB) are high in cows, pigs, sheep, and goats (Samraj et al.,

492 2015). As NTS serovars, including *S. Javiana*, are able to infect a broad host range, utilization  
493 of ArtB and PltB binding subunits would effectively expand the range of hosts that would be  
494 susceptible to this toxin. Another possibility is that *artB* and *pltB* are differentially expressed,  
495 as supported by our data that the ratio of *pltB:artB* is higher when cells are grown at neutral  
496 pH under Mg<sup>2+</sup>-limiting conditions, but *artB* is transcribed at relatively higher rates compared  
497 to *pltB* when cells are grown in acidified medium (pH 5.8). To date, the transcriptional and  
498 translational regulation of *artB* and *pltB*, and their corresponding gene products, have not  
499 been extensively characterized. Our data suggest that differential transcriptional regulation  
500 may lead to the production of different ratios of ArtB and PltB, allowing for different  
501 configurations of the binding subunit under different environmental conditions. For example,  
502 higher ArtB levels under acidic conditions may allow for enhanced ArtB levels in the  
503 acidified SCV.

504

505

### Conclusion

506

507

508

509

510

511

512

513

514

515

Overall, using *S. Javiana* as an example, our data support that ArtB and PltB compete for inclusion in the pentameric binding subunit of the TT, producing both homo- and heteropentameric forms of the binding subunit. As CDTs have been shown to play an important role in the long-term carriage of the toxin-producing pathogen (Ge et al., 2005; Del Belluz et al., 2016), our data support an additional adaptation that could explain the broad host range of *S. Javiana* and other TT-positive NTS serovars (Hoelzer et al., 2011). Moreover, using the TT as a model to study AB<sub>5</sub> toxins, our results suggest that the acquisition of multiple toxin binding subunits can be used as an evolutionary strategy to expand the number of cell, tissue, and host types that can be affected by the toxin.

516

### **Acknowledgements**

517 The authors gratefully acknowledge Dr. Pete Chandrangsu for his guidance with the *in silico*  
518 modelling, and the staff at the Cornell Statistical Consulting Unit and the Biotechnology  
519 Resource Center Imaging Facility for their guidance with statistical analyses, and flow  
520 cytometry data collection, respectively.

521

522

### **Author Contributions**

523 AG, ASH, MW, and RAC designed the study. AG, ASH, ARC, and RAC performed  
524 experimental, bioinformatical, and/or statistical analyses. All authors wrote and assisted with  
525 the revision of this manuscript.

526

527

### **Funding**

528 Confocal microscopy data were acquired through the Cornell University Biotechnology  
529 Resource Center, with NIH 1S10RR025502 funding for the shared Zeiss LSM 710 Confocal  
530 Microscope.

531

532

### **Conflict of Interest**

533 The authors declare that the submitted work was carried out in the absence of any personal,  
534 professional, or financial relationships that could potentially impact the outcomes of this  
535 research.

## References

- 536  
537  
538  
539 Allard, M.W., Muruvanda, T., Strain, E., Timme, R., Luo, Y., Wang, C., Keys, C.E., Payne,  
540 J., Cooper, T., Luong, K., Song, Y., Chin, C.S., Korch, J., Roberts, R.J., Evans, P.,  
541 Musser, S.M., and Brown, E.W. (2013). Fully assembled genome sequence for  
542 *Salmonella enterica* subsp. *enterica* serovar Javiana CFSAN001992. *Genome*  
543 *Announc.* 1, e0008113. doi: 10.1128/genomeA.00081-13.  
544 Andrews, S. (2010). "FastQC: a quality control tool for high throughput sequence data",  
545 <http://www.bioinformatics.babraham.ac.uk/projects/fastqc>.  
546 Arndt, D., Grant, J.R., Marcu, A., Sajed, T., Pon, A., Liang, Y., and Wishart, D.S. (2016).  
547 PHASTER: a better, faster version of the PHAST phage search tool. *Nucleic Acids*  
548 *Res.* 44, 16-21. doi: 10.1093/nar/gkw387.  
549 Busnell, B. (2015). "BBMap v. 35.49". <https://sourceforge.net/projects/bbmap/>.  
550 Bankevich A, N.S., Antipov D, Gurevich Aa, Dvorkin M, Kulikov as, Lesin Vm, Nikolenko  
551 Si, Pham S, Prjibelski Ad, Pyskin Av, Sirotkin Av, Vyahhi N, Tesler G, Alekseyev  
552 Ma, Pevzner Pa (2012). SPAdes: A new genome assembly algorithm and its  
553 applications to single-cell sequencing. *J. Comput. Biol.* 19, 455-477. doi:  
554 10.1089/cmb.2012.0021.  
555 Bates, D., Maechler, M., Bolker, B., Walker, S., Christensen, R., Singmann, H., Dai, B.,  
556 Grothendieck, G., and Green, P. (2019) "lme4: Linear Mixed-Effects Models Using  
557 Eigen and S4, R package version 1.1-14". [https://cran.r-](https://cran.r-project.org/web/packages/lme4/lme4.pdf)  
558 [project.org/web/packages/lme4/lme4.pdf](https://cran.r-project.org/web/packages/lme4/lme4.pdf).  
559 Battesti, A., and Bouveret, E. (2012). The bacterial two-hybrid system based on adenylate  
560 cyclase reconstitution in *Escherichia coli*. *Methods* 58, 325-334. doi:  
561 10.1016/j.ymeth.2012.07.018.  
562 Beddoe, T., Paton, A.W., Le Nours, J., Rossjohn, J., and Paton, J.C. (2010). Structure,  
563 biological functions and applications of the AB5 toxins. *Trends Biochem Sci.* 35, 411-  
564 418. doi: 10.1016/j.tibs.2010.02.003.  
565 Bolger Am, L.M., Usadel B. (2014). Trimmomatic: a flexible trimmer for Illumina sequence  
566 data. *Bioinformatics* 30. doi: 10.1093/bioinformatics/btu170.  
567 Camacho C, C.G., Avagyan V, Ma N, Papadopoulos J, Bealer K, Madden TI (2009).  
568 BLAST+: architecture and applications. *BMC Bioinformatics* 10. doi: 10.1186/1471-  
569 2105-10-421.  
570 Centers for Disease Control and Prevention (CDC). (2016). National Enteric Disease  
571 Surveillance: Salmonella Annual Report, 2016.  
572 <https://www.cdc.gov/nationalsurveillance/pdfs/2016-Salmonella-report-508.pdf>  
573 Chang, S.-J., Song, J., and Galán, J.E. (2016). Receptor-mediated sorting of typhoid toxin  
574 during its export from *Salmonella* Typhi-infected cells. *Cell Host Microbe* 20, 682-  
575 689. doi: 10.1016/j.chom.2016.10.005.  
576 Decker, K.B., James, T.D., Stibitz, S., and Hinton, D.M. (2012). The *Bordetella pertussis*  
577 model of exquisite gene control by the global transcription factor BvgA. *Microbiology*  
578 158, 1665-1676. doi: 10.1099/mic.0.058941-0.  
579 Deiwick, J., Nikolaus, T., Erdogan, S., and Hensel, M. (1999). Environmental regulation of  
580 *Salmonella* pathogenicity island 2 gene expression. *Mol. Microbiol.* 31, 1759-1773.  
581 Del Bel Belluz, L., Guidi, R., Pateras, I.S., Levi, L., Mihaljevic, B., Rouf, S.F., Wrande, M.,  
582 Candela, M., Turrone, S., Nastasi, C., Consolandi, C., Peano, C., Tebaldi, T., Viero,  
583 G., Gorgoulis, V.G., Krejsgaard, T., Rhen, M., and Frisan, T. (2016). The typhoid  
584 toxin promotes host survival and the establishment of a persistent asymptomatic  
585 infection. *PLoS Pathog.* 12, e1005528. doi: 10.1371/journal.ppat.1005528.

- 586 den Bakker, H.C., Switt, A.I.M., Govoni, G., Cummings, C.A., Ranieri, M.L., Degoricija, L.,  
587 Hoelzer, K., Rodriguez-Rivera, L.D., Brown, S., and Bolchacova, E. (2011). Genome  
588 sequencing reveals diversification of virulence factor content and possible host  
589 adaptation in distinct subpopulations of *Salmonella enterica*. *BMC Genomics* 12, 425.  
590 doi: 10.1186/1471-2164-12-425.
- 591 Deng, L., Song, J., Gao, X., Wang, J., Yu, H., Chen, X., Varki, N., Naito-Matsui, Y., Galán,  
592 J.E., and Varki, A. (2014). Host adaptation of a bacterial toxin from the human  
593 pathogen *Salmonella* Typhi. *Cell* 159, 1290-1299. doi: 10.1016/j.cell.2014.10.057.
- 594 Fass, E., and Groisman, E.A. (2009). Control of *Salmonella* pathogenicity island-2 gene  
595 expression. *Curr. Opin. Microbiol.* 12, 199-204. doi: 10.1016/j.mib.2009.01.004.
- 596 Fowler, C.C., and Galan, J.E. (2018). Decoding a *Salmonella* Typhi regulatory network that  
597 controls typhoid toxin expression within human cells. *Cell Host Microbe* 23, 65-  
598 76.e66. doi: 10.1016/j.chom.2017.12.001.
- 599 Gao, X., Deng, L., Stack, G., Yu, H., Chen, X., Naito-Matsui, Y., Varki, A., and Galán, J.E.  
600 (2017). Evolution of host adaptation in the *Salmonella* typhoid toxin. *Nat Microbiol.*  
601 2, 1592-1599. doi: 10.1038/s41564-017-0033-2.
- 602 Gardner Sn, S.T., Hall B.G. (2015). kSNP3.0: SNP detection and phylogenetic analysis of  
603 genomes without genome alignment or reference genome. *Bioinformatics* 31, 2877-  
604 2878. doi: 10.1093/bioinformatics/btv271.
- 605 Ge, Z., Feng, Y., Whary, M.T., Nambiar, P.R., Xu, S., Ng, V., Taylor, N.S., and Fox, J.G.  
606 (2005). Cytolethal distending toxin is essential for *Helicobacter hepaticus*  
607 colonization in outbred Swiss Webster mice. *Infect. Immun.* 73, 3559-3567.
- 608 Gurevich A, S.V., Vyahhi N, Tesler G (2013). QUAST: quality assessment tool for genome  
609 assemblies. *Bioinformatics* 29, 1072-1075. doi: 10.1093/bioinformatics/btt086.
- 610 Haghjoo, E., and Galán, J.E. (2004). *Salmonella* typhi encodes a functional cytolethal  
611 distending toxin that is delivered into host cells by a bacterial-internalization pathway.  
612 *Proc. Nat. Acad. Sci.* 101, 4614-4619.
- 613 Hoelzer, K., Moreno Switt, A.I., and Wiedmann, M. (2011). Animal contact as a source of  
614 human non-typhoidal salmonellosis. *Vet. Res.* 42, 34. doi: 10.1186/1297-9716-42-34.
- 615 Hothorn, T., Bretz, F., and Westfall, P. (2008). Simultaneous inference in general parametric  
616 models. *Biom. J.* 50, 346-363. doi: 10.1002/bimj.200810425.
- 617 Karimova, G., Ullmann, A., and Ladant, D. (2001). Protein-protein interaction between  
618 *Bacillus stearothermophilus* tyrosyl-tRNA synthetase subdomains revealed by a  
619 bacterial two-hybrid system. *J. Mol. Microbiol. Biotechnol.* 3, 73-82.
- 620 Kelley, L.A., Mezulis, S., Yates, C.M., Wass, M.N., and Sternberg, M.J. (2015). The Phyre2  
621 web portal for protein modeling, prediction and analysis. *Nat. Protoc.* 10, 845-858.  
622 doi: 10.1038/nprot.2015.053.
- 623 Krissinel, E., and Henrick, K. (2007). Inference of macromolecular assemblies from  
624 crystalline state. *J. Mol. Biol.* 372, 774-797.
- 625 Kuznetsova, A., Brockhoff, P.B., and Christensen, R.H.B. (2019). Package ‘lmerTest’. *R*  
626 *package version* 3.1-0. <https://cran.r-project.org/web/packages/lmerTest/lmerTest.pdf>.
- 627 Layne, E. (1957). Spectrophotometric and turbidimetric methods for measuring proteins.  
628 *Methods Enzymol.* 3, 447-454.
- 629 Li H, H.B., Wyosoker a, Fennell T, Ruan J, Homer N (2009). The sequence alignment/map  
630 format and SAMtools. *Bioinformatics* 25, 2078-2079.
- 631 Loch, C., Coutte, L., and Mielcarek, N. (2011). The ins and outs of pertussis toxin. *FEBS J.*  
632 278, 4668-4682. doi: 10.1111/j.1742-4658.2011.08237.x.
- 633 Miller, R., and Wiedmann, M. (2016a). Dynamic duo—the *Salmonella* cytolethal distending  
634 toxin combines ADP-ribosyltransferase and nuclease activities in a novel form of the  
635 cytolethal distending toxin. *Toxins* 8, 121. doi: 10.3390/toxins8050121.

- 636 Miller, R.A., Betteken, M.I., Guo, X., Altier, C., Duhamel, G.E., and Wiedmann, M. (2018).  
637 The Typhoid toxin produced by the nontyphoidal *Salmonella enterica* serotype  
638 Javiana is required for induction of a DNA damage response in vitro and systemic  
639 spread in vivo. *mBio* 9, e00467-00418. doi: 10.1128/mBio.00467-18.
- 640 Miller, R.A., and Wiedmann, M. (2016b). The cytolethal distending toxin produced by  
641 nontyphoidal *Salmonella* serotypes Javiana, Montevideo, Oranienburg, and  
642 Mississippi induces DNA damage in a manner similar to that of serotype Typhi. *mBio*  
643 7, e02109-02116. doi: 10.1128/mBio.02109-16.
- 644 Nešić, D., Hsu, Y., and Stebbins, C.E. (2004). Assembly and function of a bacterial  
645 genotoxin. *Nature* 429, 429-433.
- 646 Perreault, N., and Beaulieu, J.F. (1996). Use of the dissociating enzyme thermolysin to  
647 generate viable human normal intestinal epithelial cell cultures. *Exp. Cell. Res.* 224,  
648 354-364.
- 649 Pettersen, E.F., Goddard, T.D., Huang, C.C., Couch, G.S., Greenblatt, D.M., Meng, E.C., and  
650 Ferrin, T.E. (2004). UCSF Chimera--a visualization system for exploratory research  
651 and analysis. *J. Comput. Chem.* 25, 1605-1612.
- 652 R Core Team. (2016). R: A Language and Environment for Statistical Computing. Vienna: R  
653 Foundation for Statistical Computing.
- 654 Raze, D., Veithen, A., Sato, H., Antoine, R., Menozzi, F.D., and Locht, C. (2006). Genetic  
655 exchange of the S2 and S3 subunits in pertussis toxin. *Mol. Microbiol.* 60, 1241-1250.
- 656 Rodriguez-Rivera, L.D., Bowen, B.M., den Bakker, H.C., Duhamel, G.E., and Wiedmann, M.  
657 (2015). Characterization of the cytolethal distending toxin (typhoid toxin) in non-  
658 typhoidal *Salmonella* serovars. *Gut pathogens* 7, 1. doi: 10.1186/s13099-015-0065-  
659 1.
- 660 Saitoh, M., Tanaka, K., Nishimori, K., Makino, S.-I., Kanno, T., Ishihara, R., Hatama, S.,  
661 Kitano, R., Kishima, M., and Sameshima, T. (2005). The *artAB* genes encode a  
662 putative ADP-ribosyltransferase toxin homologue associated with *Salmonella*  
663 *enterica* serovar Typhimurium DT104. *Microbiology* 151, 3089-3096.
- 664 Samraj, A.N., Pearce, O.M., Läubli, H., Crittenden, A.N., Bergfeld, A.K., Banda, K., Gregg,  
665 C.J., Bingman, A.E., Secrest, P., and Diaz, S.L. (2015). A red meat-derived glycan  
666 promotes inflammation and cancer progression. *Proc. Nat. Acad. Sci.* 112, 542-547.  
667 doi: 10.1073/pnas.1417508112.
- 668 Schindelin, J., Arganda-Carreras, I., Frise, E., Kaynig, V., Longair, M., Pietzsch, T.,  
669 Preibisch, S., Rueden, C., Saalfeld, S., and Schmid, B. (2012). Fiji: an open-source  
670 platform for biological-image analysis. *Nat. Methods* 9, 676-682. doi:  
671 10.1038/nmeth.2019.
- 672 Schmittgen, T.D., and Livak, K.J. (2008). Analyzing real-time PCR data by the comparative  
673 C(T) method. *Nat. Protoc.* 3, 1101-1108.
- 674 Song, J., Gao, X., and Galán, J.E. (2013). Structure and function of the *Salmonella* Typhi  
675 chimaeric A2B5 typhoid toxin. *Nature* 499, 350-354. doi: 10.1038/nature12377.
- 676 Spanò, S., Ugalde, J.E., and Galán, J.E. (2008). Delivery of a *Salmonella* Typhi exotoxin  
677 from a host intracellular compartment. *Cell Host Microbe* 3, 30-38. doi:  
678 10.1016/j.chom.2007.11.001.
- 679 Stamatakis, A. (2014). RAxML version 8: a tool for phylogenetic analysis and post-analysis  
680 of large phylogenies. *Bioinformatics* 30: 1312-1313. doi:  
681 10.1093/bioinformatics/btu033.
- 682 Stoscheck, C.M. (1990). Quantitation of protein. *Methods Enzymol.* 182, 50-68.
- 683 Tamamura, Y., Tanaka, K., and Uchida, I. (2017). Characterization of pertussis-like toxin  
684 from *Salmonella* spp. that catalyzes ADP-ribosylation of G proteins. *Sci. Rep.* 7,  
685 2653-2653. doi: 10.1038/s41598-017-02517-2.



- 686 Timme, R.E., Leon, M.S., and Allard, M.W. (2019). "Utilizing the Public GenomeTrakr  
687 Database for Foodborne Pathogen Traceback," in *Foodborne Bacterial Pathogens*.  
688 Springer, 201-212.
- 689 Wersto, R.P., Chrest, F.J., Leary, J.F., Morris, C., Stetler-Stevenson, M., and Gabrielson, E.  
690 (2001). Doublet discrimination in DNA cell-cycle analysis. *Cytometry* 46, 296-306.
- 691 Yoshida Ce, K.P., Laing Cr, Lingohr Ej, Gannon Vpj, Nash Jhe, Taboda En (2016). The  
692 *Salmonella* in silico typing resource (SISTR): an open web-accessible tool for rapidly  
693 typing and subtyping draft *Salmonella* genome assemblies. *PLoS One* 11. doi:  
694 10.1371/journal.pone.0147101.
- 695 Young, V.B., Knox, K.A., and Schauer, D.B. (2000). Cytolethal distending toxin sequence  
696 and activity in the enterohepatic pathogen *Helicobacter hepaticus*. *Infect. Immun.* 68,  
697 184-191.
- 698
- 699

700

## Figure Legends

701 **Figure 1. Operon structure and conservation of *artB* in *S. Javiana*.** (A) Operon structure  
702 of the *cdtB*-islet and *artB*-islet in *S. Javiana* strain CFSAN001992. *artA* in *S. Javiana* is a  
703 pseudogene as it has a frame shift mutation leading to a premature stop codon; the end of  
704 *artA* is predicted to be within *artB* as shown. (B) Maximum likelihood tree constructed with  
705 core SNPs from *S. Javiana* isolates. RaXML was used to generate the maximum likelihood  
706 tree using a general time-reversible model with gamma-distributed sites. One thousand  
707 bootstrap repetitions were performed; only bootstrap values >70 are shown. *S. Mississippi*  
708 isolate SRR1960042 was used as an outgroup to root the tree. The *S. Javiana* strain (FSL S5-  
709 0395) that was used for all experiments is also included in the phylogenetic tree. Isolates for  
710 which *artB* was not detected are shown in red and isolates with the 46-nucleotide deletion in  
711 *artB* are shown in blue. The scale bar represents the average number of nucleotide  
712 substitutions per site. (C) DNA sequence alignment between *S. Javiana* strain FSL S5-0395  
713 and a representative isolate (SRR1561167) containing the 46-nucleotide deletion, which  
714 results in a frameshift that generates a premature stop codon.

715 **Figure 2. Modeling and interface analyses of binding subunits with different ratios of**  
716 **PltB and ArtB.** Energies calculated between each binding subunit are color coded to  
717 represent the interaction: PltB-PltB are shown in blue, ArtB-ArtB in red, and PltB-ArtB in  
718 purple. IA: interface area in Angstroms (Å);  $\Delta G$  solvation free energy gain upon formation of  
719 the interface (kcal/M). Negative  $\Delta G$  values correspond to hydrophobic interfaces, and  
720 therefore a positive protein affinity.

721

722 **Figure 3. Analysis of PltB-ArtB heteropentamer formation.** (A) Schematic of the method  
723 used to screen two-hybrid system clones. In the example shown, regions expressing different  
724 domains of PltB were fused to adenylate cyclase domain T18 or T25. All T18 or T25 clones  
725 were pooled into “banks” that were co-transformed into the cAMP-null (*cyaA*<sup>-</sup>) *E. coli*  
726 BTH101 strain. Screening was performed by growing the transformants on LB agar  
727 supplemented with IPTG and X-gal. Plasmid DNA was isolated from clones with positive  
728 interactions and was re-transformed into *E. coli* BTH101 to exclude the possibility of CAP\*  
729 mutants. Confirmed interactions were submitted for Sanger sequencing to determine the  
730 identity of the interacting domains (B) *E. coli* BTH101 two-hybrid system strains grown on  
731 LB agar supplemented with IPTG and X-gal. Clones that showed positive interactions appear  
732 blue. Colored boxes show the fusion of either the interacting domain (\_ID) or the full-length  
733 protein (\_Full) for PltB, PltA, CdtB, and ArtB to either the CyaA-25 (shown in blue) or  
734 CyaA-18 subunits (shown in yellow) of the two-hybrid system. (C) Detection of interactions  
735 of ArtB and PltB in *S. Javiana* *cyaA*<sup>-</sup> strains harboring two-hybrid system plasmids. *S. Javiana*  
736 cells were grown for 24 h in M63 minimal medium with maltose as the sole carbon source,  
737 and absorbance was measured at 600 nm. Error bars indicate the standard deviation of the  
738 mean of three independent experiments. Asterisks denote significant differences ( $p < 0.05$ )  
739 from the negative control before (blue) and after (pink) Dunnett’s test for multiple  
740 comparisons adjustment; the PltB<sub>T25</sub> + ctArtB<sub>T18</sub> interaction was marginally significant after  
741 multiple comparisons corrections ( $P = 0.0973$ ). (D) Detection of PltB-3xFLAG and ArtB-c-  
742 Myc using TAP-tagging. Holotoxins were pulled down from *E. coli* BTH101 strains  
743 expressing CdtB-His, PltA-Strep, PltB-3xFLAG, and ArtB-c-Myc using anti-His antibodies  
744 (lane 1) followed by purification of PltB-3xFLAG-containing holotoxins by pulling down  
745 with anti-FLAG magnetic beads (lane 2). Proteins were visualized with antibody staining to  
746 detect PltB-3xFLAG (left panel) and ArtB-c-Myc (right panel). “L” represents the Western C  
747 (BioRad) protein ladder. The results of one representative experiment are shown; the assay  
748 was performed in two independent experiments.

749

750 **Figure 4. Holotoxins containing PltB-3xFLAG, ArtB-c-Myc, and a mix of PltB-3xFLAG**  
751 **and ArtB-c-Myc, activate the DDR in human intestinal epithelial cells (HIEC-6 cells).**

752 (A) IF staining of HIEC-6 cells co-incubated for 24 h with various total cell lysates  
753 containing CdtB-His, PltA-Strep, PltB-3xFLAG, and ArtB-c-Myc. DDR proteins are shown  
754 in green (53BP1) and red ( $\gamma$ H2AX); nucleic acids are stained with DAPI (blue). Scale bar  
755 represents 20  $\mu$ m. (B) Quantification of HIEC-6 cell nuclei having  $\geq$  four 53BP1-foci, as well  
756 as  $\gamma$ -H2AX foci; the table below the graph shows which subunits were present in the  
757 supernatant added to the HIEC-6 cells. Two negative controls were included and are  
758 represented by the final two bars in the graphic, which represent cell populations that were  
759 treated with supernatants from *E. coli* BTH101 cells with an empty vector (left) and untreated  
760 cell populations (right). (C) Proportion of cells in the G2/M cell cycle phase following co-  
761 incubation with different toxin subunit combinations for 24 hrs. Error bars represent standard  
762 deviations of the mean; bars that do not share letters are statistically different ( $P < 0.05$ ).  
763 Results represent the average of three independent experiments.

764

765 **Figure 5. Competition and expression of PltB-ArtB heteropentamer formation *in vitro*.**

766 (A) Results of the binding subunit exchange assay. PltB-3xFLAG was added in varying  
767 concentrations to lysates containing CdtB-His, PltA-FLAG, ArtB-c-Myc (left panels), or  
768 ArtB-c-Myc was added to lysates containing CdtB-His, PltA-FLAG, PltB-3xFLAG (right  
769 panels). Holotoxins were purified by pulling down with anti-His to detect CdtB-His, and  
770 subunits were detected using tag-specific antibodies (PltA-FLAG, CdtB-His, and PltB-  
771 3xFLAG). One representative experiment is shown; the assay was performed in three  
772 independent experiments (B) Fold expression ( $2^{-\Delta\Delta CT}$ ) of *pltB*, *cdtB*, and *artB* in *S. Javiana*  
773 cells grown for 5 h in either N salts minimal media at pH 7 or pH 5.8, normalized to  
774 expression of *S. Javiana* cells grown for 3 h in LB broth pH 7. Results are averaged from  
775 three independent experiments. (C) Proposed model for production of TT binding subunits.  
776 *artB* and *pltB* are co-expressed under low  $Mg^{2+}$  culturing conditions, but at neutral pH PltB  
777 outcompetes ArtB for inclusion in the final pentameric binding subunit, although  
778 homopentamers of ArtB and also heteropentamers of ArtB-PltB are also produced. The  
779 production of multiple variations of the binding subunit is predicted to expand the types of  
780 hosts, tissues, and cells that the toxin can bind to.



### 5 PltB

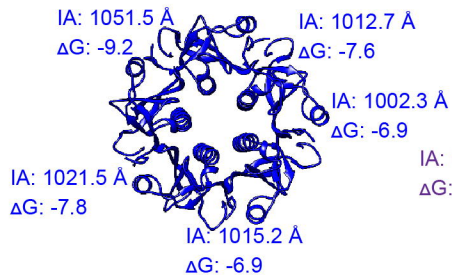

### 4 PltB 1 ArtB

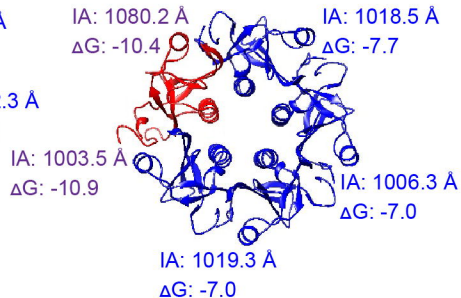

### 3 PltB 2 ArtB

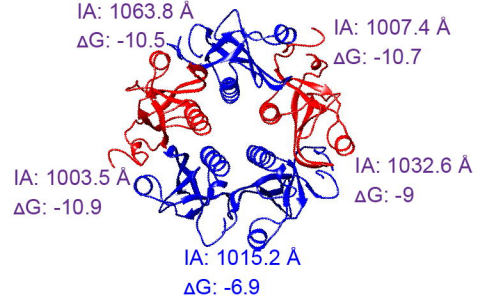

### 2 PltB 3 ArtB

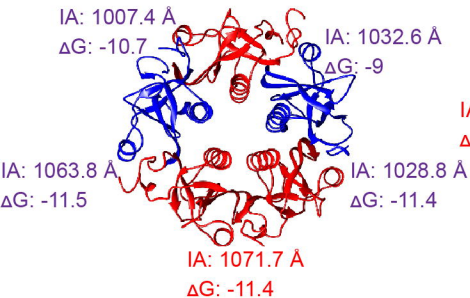

### 1 PltB 4 ArtB

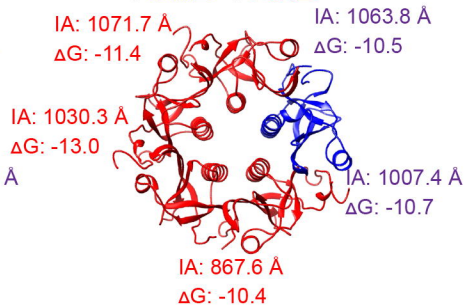

### 5 ArtB

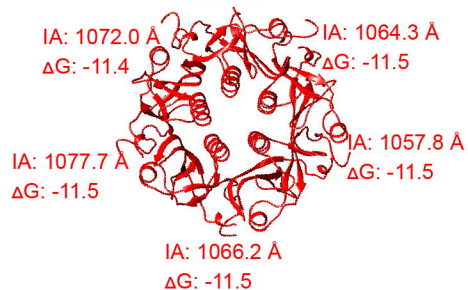

**A**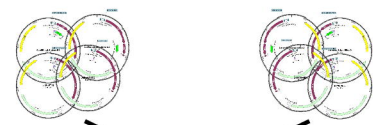

T25 Bank      T18 Bank

Transform *cyaA*<sup>-</sup> strain

LB Agar + IPTG + X-gal

Plasmid isolation from positive clones

Transform *cyaA*<sup>-</sup> strain

White Colonies:  
CAP\*

Blue Colonies:  
Sanger Sequencing

**C**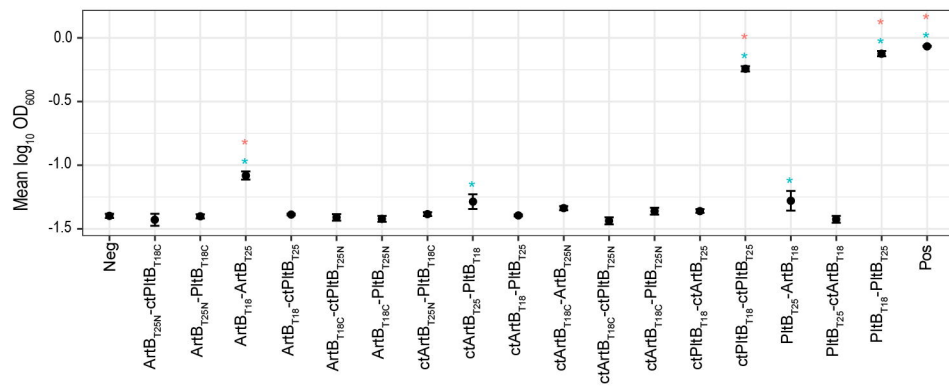**B**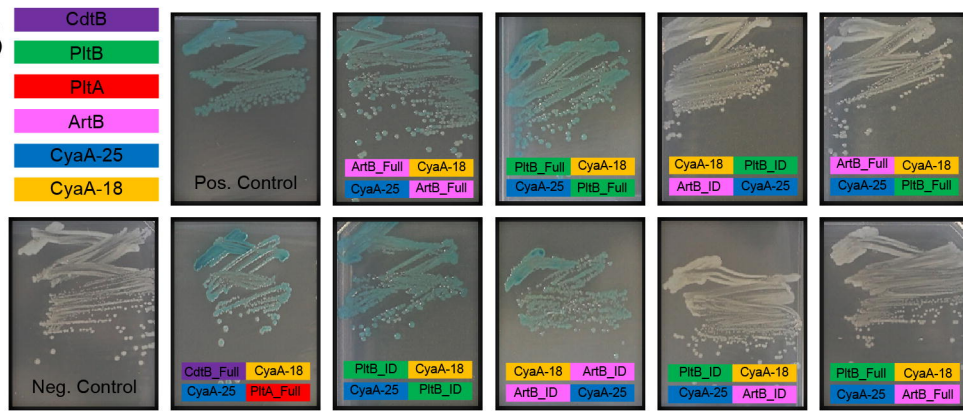**D**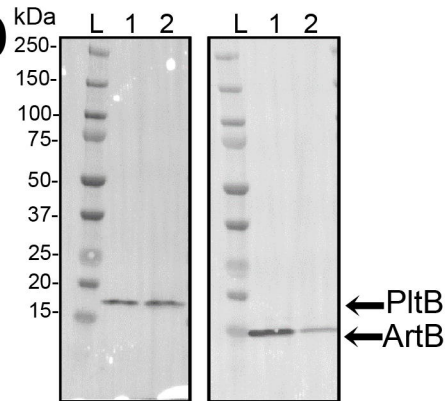

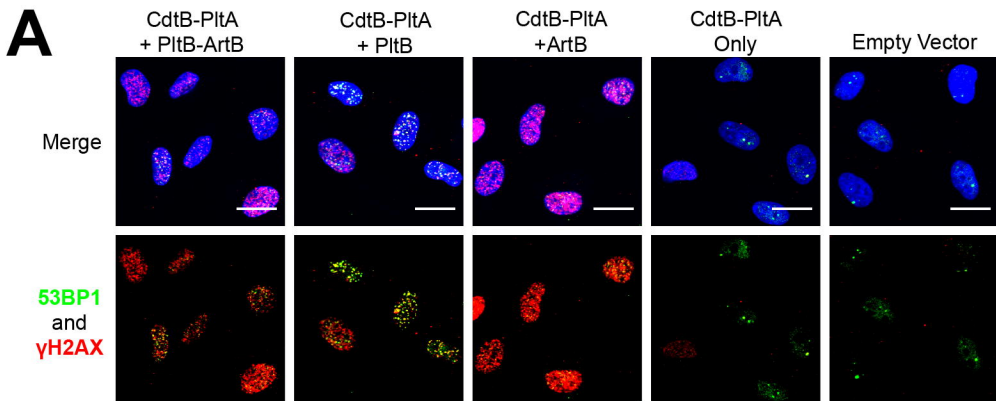

**B**

% Cells with γH2AX  
and 53BP1 foci

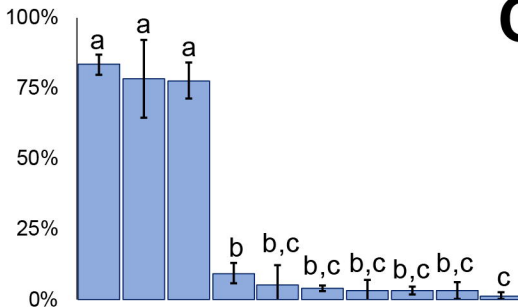

|             |   |   |   |   |   |
|-------------|---|---|---|---|---|
| <b>CdtB</b> | + | + | + | + | + |
| <b>PitA</b> | + | + | + | + | + |
| <b>PitB</b> | + | + |   |   | + |
| <b>ArtB</b> | + |   | + |   | + |

**C**

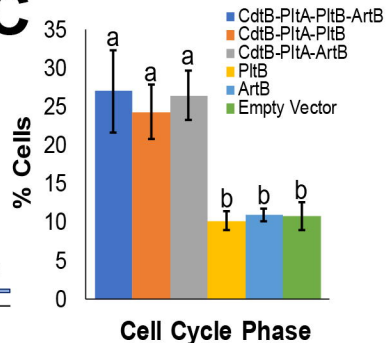

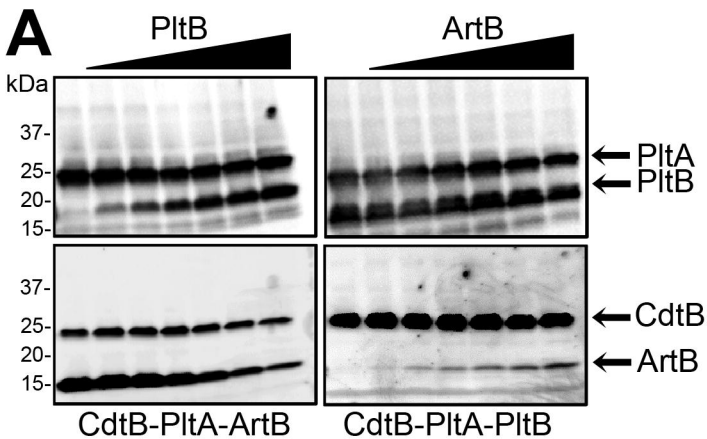

**B**

| Condition        | <i>pltB</i> | <i>cdtB</i> | <i>artB</i> |
|------------------|-------------|-------------|-------------|
| LB pH 7.4        | 1.00        | 1.00        | 1.00        |
| N minimal pH 7   | 135.40      | 364.28      | 43.84       |
| N minimal pH 5.8 | 69.83       | 381.81      | 85.50       |

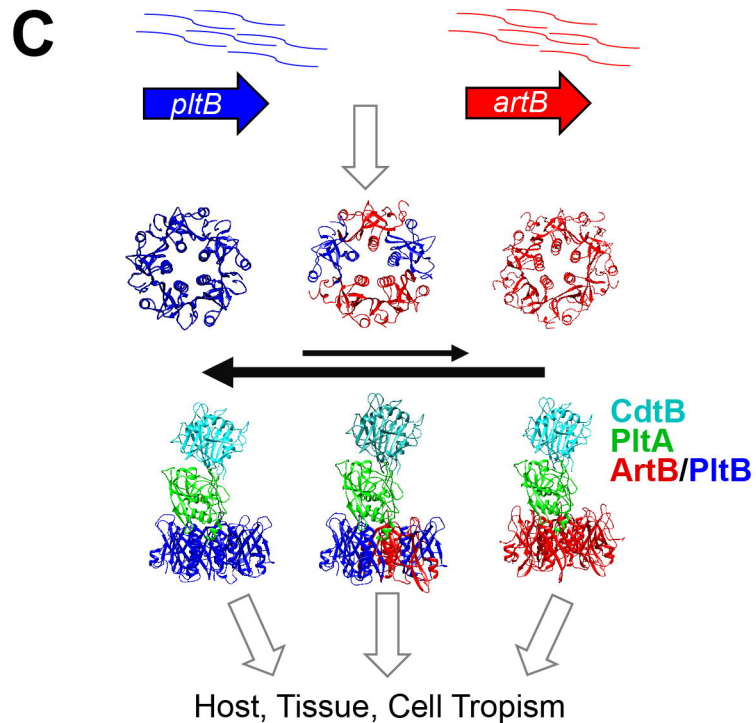

Source: https://www.biorxiv.org/content/10.1101/666016v1.full.pdf
